# Supplementary material for: CAMS-REG-v4: a state-of-the-art high-resolution European emission inventory for air quality modelling
Source: Copernicus journal article supplement (doi:10.5194/essd-14-491-2022), 2022-02-07
Supplement: Supplementary file 1 [file essd-14-491-2022-supplement.zip]

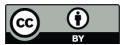

## *Supplement of*

# **CAMS-REG-v4: a state-of-the-art high-resolution European emission inventory for air quality modelling**

**Jeroen Kuenen et al.**

*Correspondence to:* Jeroen Kuenen ([jeroen.kuenen@tno.nl](mailto:jeroen.kuenen@tno.nl))

- [essd-14-491-2022-supplement-title-page.pdf](#)
- CAMS-REG-v4\_2\_paper\_SI\_submitted\_July2021\_rev20210830
  - CAMS-REG-v4\_2\_paper\_SI.docx
  - CAMS-REG-v4\_2\_paper\_SI\_Tables.xlsx

The copyright of individual parts of the supplement might differ from the article licence.
